# Supplementary material for: MetS Prevalence and Its Association with Dietary Patterns among Chinese Middle-Aged and Elderly Population: Results from a National Cross-Sectional Study
Source: MDPI journal article supplement (doi:10.3390/nu14245301), 2022-12-13
Supplement: s1 [file s1]

# Supplementary Materials

**Table S1.** Food categories for dietary pattern in the study.

| No. | Food categories          | Foods name                                                                      |
|-----|--------------------------|---------------------------------------------------------------------------------|
| 1   | Rice products            |                                                                                 |
| 2   | Wheat products           |                                                                                 |
| 3   | Other cereals            | oat, sorghum, maize, millets, buckwheat, etc                                    |
| 4   | Tubers                   | taro, sweet potatoes, Chinese yam, potatoes, etc.                               |
| 5   | Dry legume               | peas, red beans, mung beans, kidney beans, cowpea, etc.                         |
| 6   | Legume products          | green beans, soybeans, black beans, bean curd, tofu, soybean milk, etc.         |
| 7   | Dark colored vegetables  | spinach, broccoli, tomato, carrot, chili peppers, purple cabbage, lettuce, etc. |
| 8   | Light colored vegetables | cucumber, eggplant, celery, zucchini, lotus root, etc.                          |
| 9   | Fungi and algae          | edible mushroom, kelp, laver                                                    |
| 10  | Fresh fruits             | apple, kiwi fruit, blueberry, banana, grape, watermelon, etc.                   |
| 11  | Nuts                     | walnuts, chestnuts, peanuts,                                                    |
| 12  | Pork                     |                                                                                 |
| 13  | Other red meat           | beef, mutton, horsemeat, etc.                                                   |
| 14  | Red meat offal           | liver, belly, lung, etc.                                                        |
| 15  | Poultry                  | chicken, duck, goose, etc.                                                      |
| 16  | Milk and dairy products  | Pure milk, milk powder, cheese, yogurt                                          |
| 17  | Eggs                     |                                                                                 |
| 18  | Aquatic products         | fish, shrimp and shellfish                                                      |
| 19  | Cakes and desserts       | cakes, chocolate, cookie, pasty, etc.                                           |
| 20  | Candy and starch         | white sugar, brown sugar, vermicelli, etc.                                      |
| 21  | Vegetable oil            | soybean oil, rapeseed oil, salad oil, sunflower seeds oil, etc.                 |
| 22  | Animal oil               | lard oil, beef tallow, etc                                                      |
| 23  | Salt                     |                                                                                 |
